# Supplementary material for: Tetraguanidino-functionalized phenazine and fluorene dyes: synthesis, optical properties and metal coordination
Source: Royal Society of Chemistry journal article supplement (doi:10.1039/c4dt03572k), 2015-01-01

## **Supporting Information**

### **Tetraguanidino-Functionalized Phenazine and Fluorene Dyes: Synthesis and Coordination Chemistry**

Elvira Bindewald, Roxana Lorenz, Olaf Hübner, Dominik Brox, Dirk-Peter Herten, Elisabeth  
Kaifer, Hans-Jörg Himmel\*

**Figure S1.** a) CV curve recorded for **1** ( $\text{CH}_2\text{Cl}_2$ ,  $c = 10^{-3}$  mol/l, Ag/AgCl electrode, potentials relative to Fc/Fc<sup>+</sup> (Fc = ferrocene), [(*n*-Bu)<sub>4</sub>N][PF<sub>6</sub>],  $c = 0.1$  mol/l).

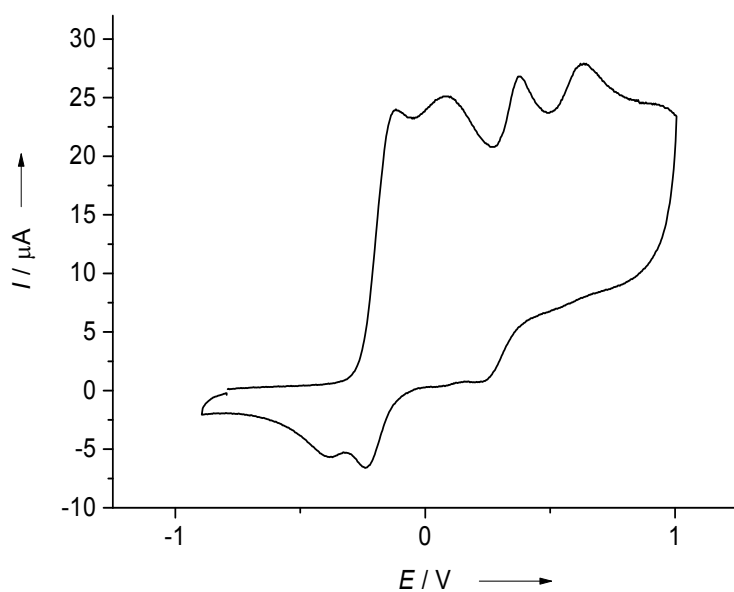

b) CV curve recorded for **1** ( $\text{CH}_2\text{Cl}_2$ ,  $c = 10^{-3}$  mol/l, Pt electrode, potentials relative to Fc/Fc<sup>+</sup> (Fc = ferrocene), [(*n*-Bu)<sub>4</sub>N][PF<sub>6</sub>],  $c = 0.1$  mol/l).

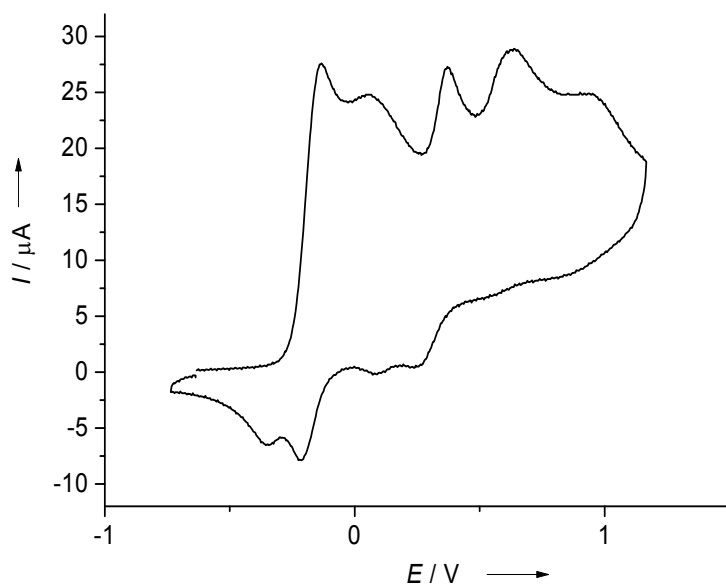

**Figure S2.** c) Structure of  $[\mathbf{1H}_2](\text{BF}_4)_2$ . Vibrational ellipsoids drawn at the 50% probability level. Hydrogen atoms omitted for sake of clarity. Selected bond distances (in Å): N1-C1 1.4001(18), N1-C7 1.3545(19), N2-C7 1.3253(19), N3-C7 1.3401(19), N4-C2 1.3874(18), N4-C12 1.3055(19), N5-C12 1.3672(19), N6-C12 1.3684(19), C1-C2 1.451(2), C1-C6 1.360(2), C2-C3 1.373(2), C3-C4 1.417(2), C4-N7 1.3476(18), C4-C5 1.4362(19), C5-N7' 1.3433(18), C5-C6 1.422(2), N1H-F3 2.338.

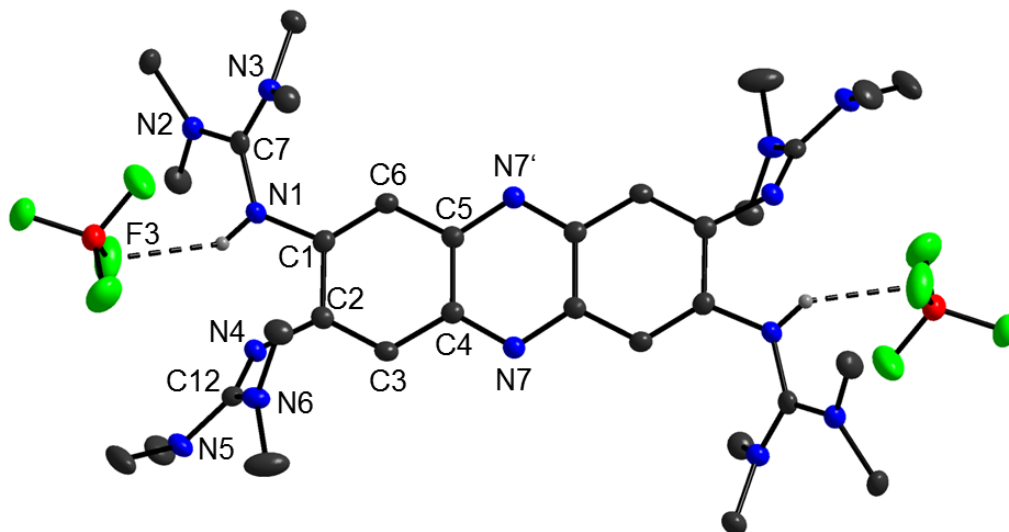

Crystal data for  $[\mathbf{1H}_2](\text{BF}_4)_2$ ,  $\text{C}_{32}\text{H}_{54}\text{B}_2\text{F}_8\text{N}_{14}$ :  $M_r = 808.51$ ,  $0.0850 \times 0.0680 \times 0.0298 \text{ mm}^3$ , monoclinic, space group  $\text{P}2_1/\text{n}$ ,  $a = 8.10458(13)$ ,  $b = 30.8148(4)$ ,  $c = 8.16009(13) \text{ \AA}$ ,  $\beta = 94.0820(16)^\circ$ ,  $V = 2032.74(6) \text{ \AA}^3$ ,  $Z = 2$ ,  $d_{\text{calc}} = 1.321 \text{ Mg}\cdot\text{m}^{-3}$ , Mo  $K\alpha$  radiation (graphite monochromated,  $\lambda = 0.71073 \text{ \AA}$ ),  $T = 100 \text{ K}$ ,  $\theta_{\text{range}} 2.811$  to  $35.250^\circ$ . Reflections measd. 57051, indep. 3867,  $R_{\text{int}} = 0.0495$ . Final  $R$  indices [ $I > 2\sigma(I)$ ]:  $R_1 = 0.0374$ ,  $wR_2 = 0.0941$ .

**Figure S3.** a) Photos showing the emission of solutions of compound **5** in different organic solvents under UV-light (from left to right: toluene, CH<sub>3</sub>CN, Et<sub>2</sub>O, THF, H<sub>2</sub>O and CH<sub>2</sub>Cl<sub>2</sub>). b) Electronic absorption and emission spectra for solutions of compound **5** in THF solution. c) Electronic absorption and emission spectra for solutions of compound **5** in Et<sub>2</sub>O solution.

a)

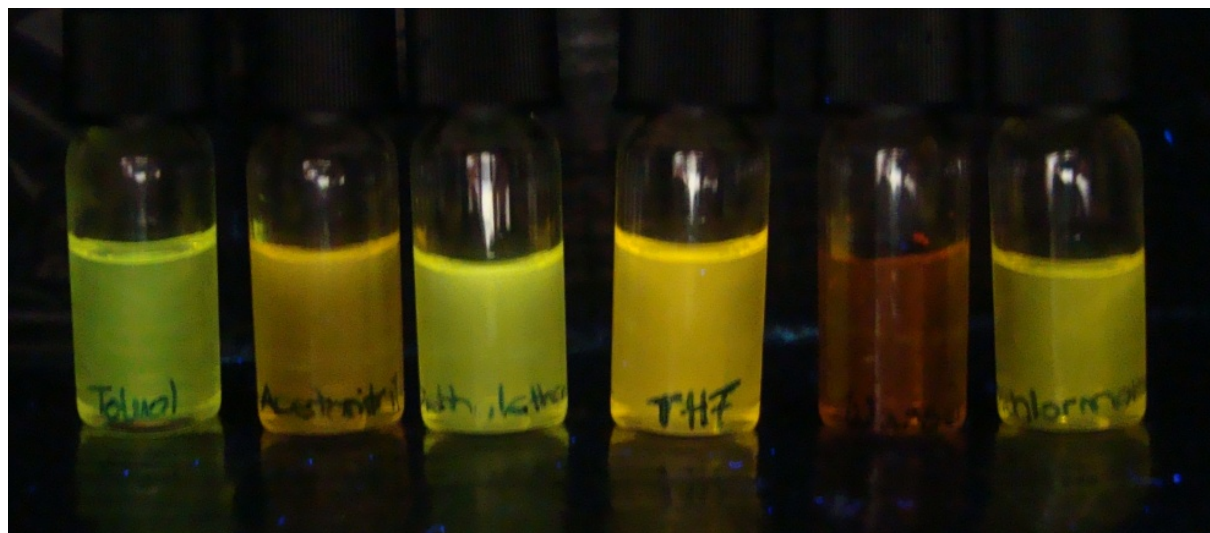

b)

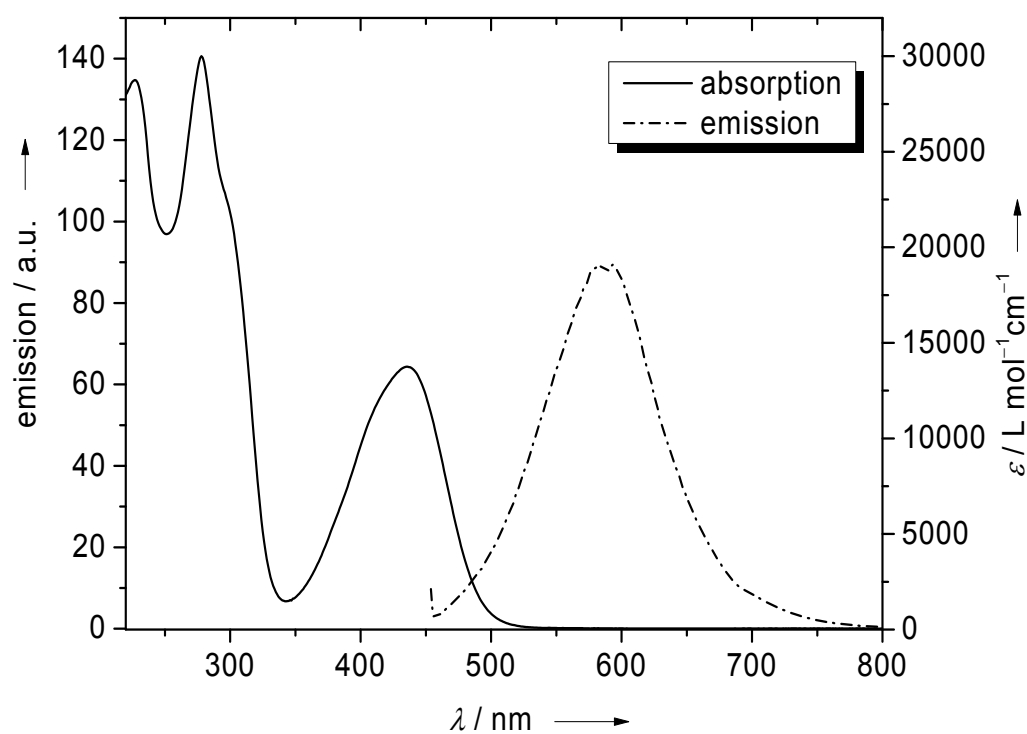

c)

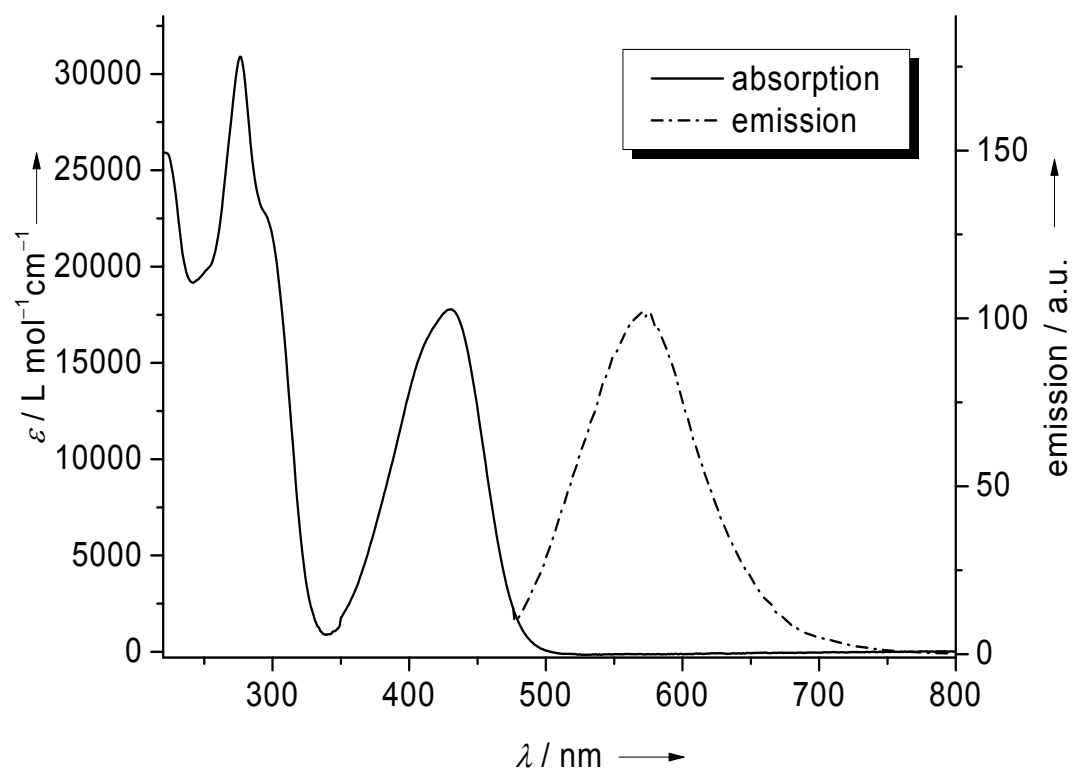

**Figure S4.** Lifetime decay curves for compounds **1** and **5** and the respective  $\text{ZnCl}_2$  complexes [**1**( $\text{ZnCl}_2$ )<sub>2</sub>] and [**5**( $\text{ZnCl}_2$ )] (IRF standard: LUDOX<sup>®</sup>). Fluorescence excitation was performed with a 280 nm pulsed LED at 10 MHz repetition rate.

Shown are the respective decay curves measured in acetonitrile, the model fit curve and the residuals ( $\chi^2$  was  $1.00 \pm 0.05$  for all fits). Amplitude weighted average lifetimes are  $\tau_{\text{AV}} = 4.6(2)$  ns (**1**),  $\tau_{\text{AV}} = 7.6(6)$  ns (**5**),  $\tau_{\text{AV}} = 1.8(4)$  ns ([**1**( $\text{ZnCl}_2$ )<sub>2</sub>]),  $\tau_{\text{AV}} = 1.3(5)$  ns ([**5**( $\text{ZnCl}_2$ )]).

Interestingly, the average lifetimes are nearly independent of the excitation wavelength in acetonitrile. When using a 450 nm pulsed LED, amplitude weighted average lifetimes are  $\tau_{\text{AV}} = 4.6(8)$  ns (**1**),  $\tau_{\text{AV}} = 7.9(3)$  ns (**5**),  $\tau_{\text{AV}} = 1.8(4)$  ns ([**1**( $\text{ZnCl}_2$ )<sub>2</sub>]),  $\tau_{\text{AV}} = 1.3(4)$  ns ([**5**( $\text{ZnCl}_2$ )]).

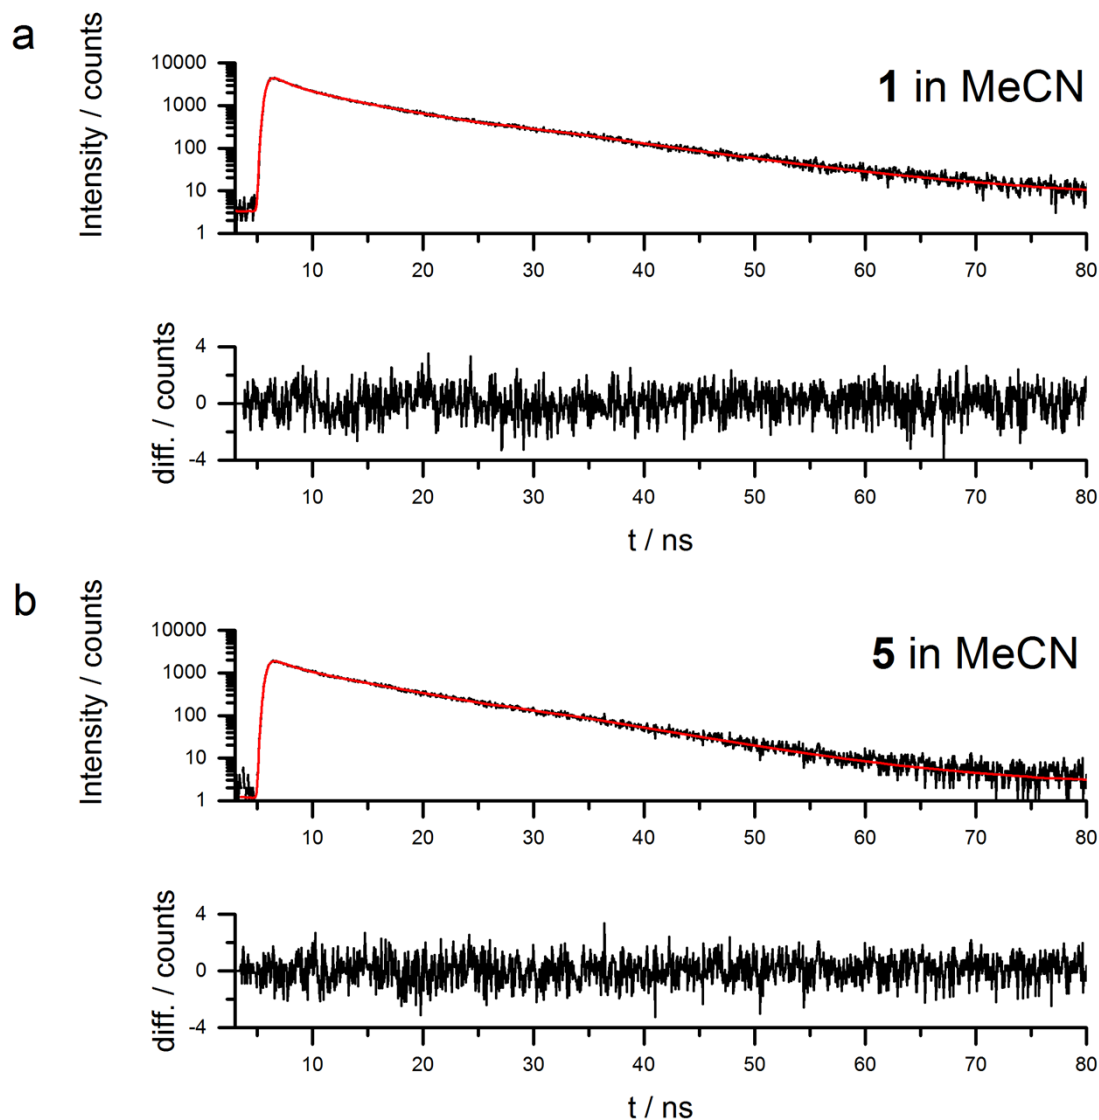

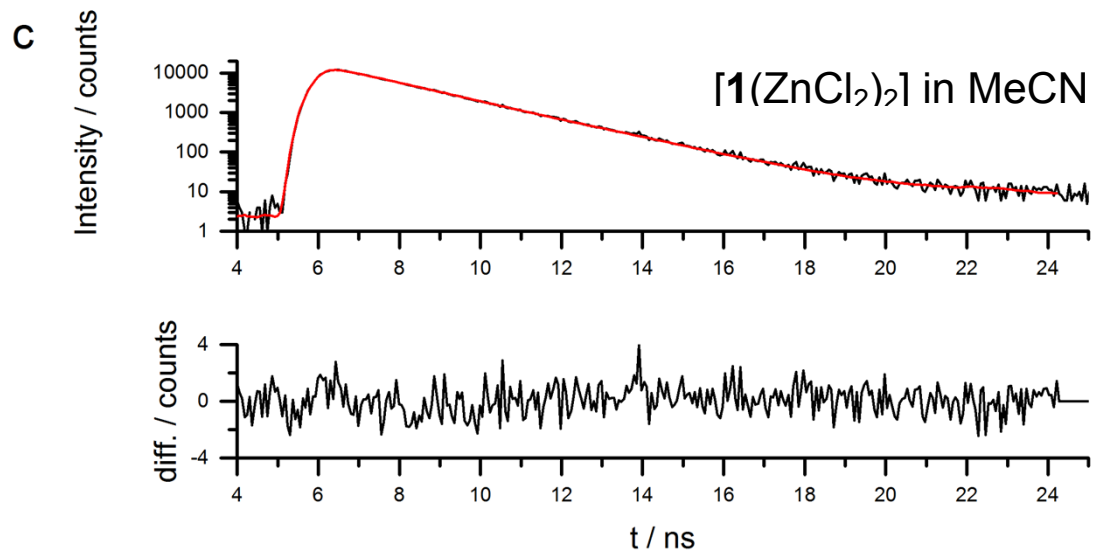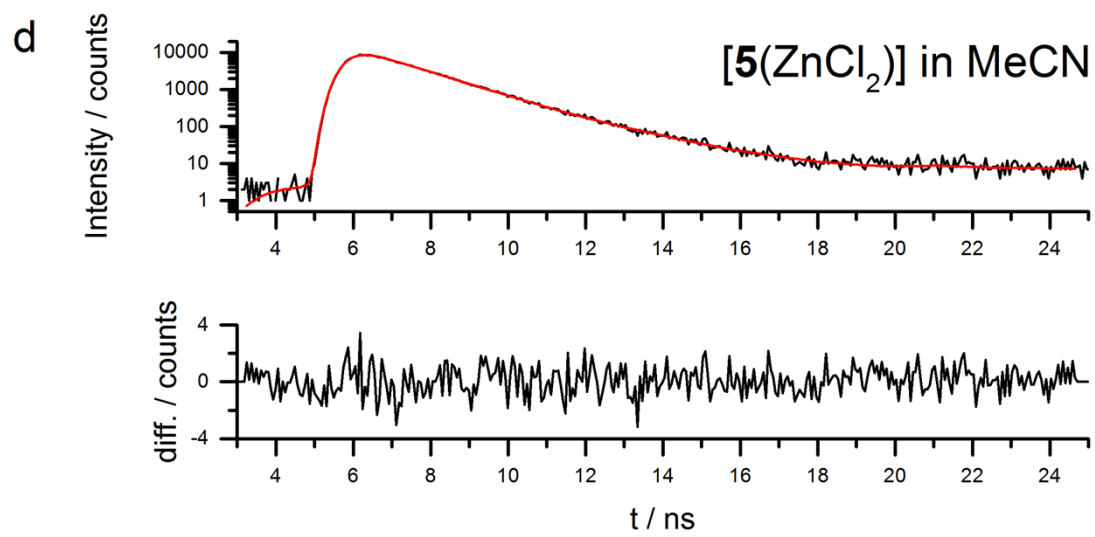

**Figure S5.** Comparison between the UV/Vis spectra of  $[\mathbf{1}(\text{CuI})_2]$  in  $\text{CH}_2\text{Cl}_2$  and  $\text{CH}_3\text{CN}$  solutions.

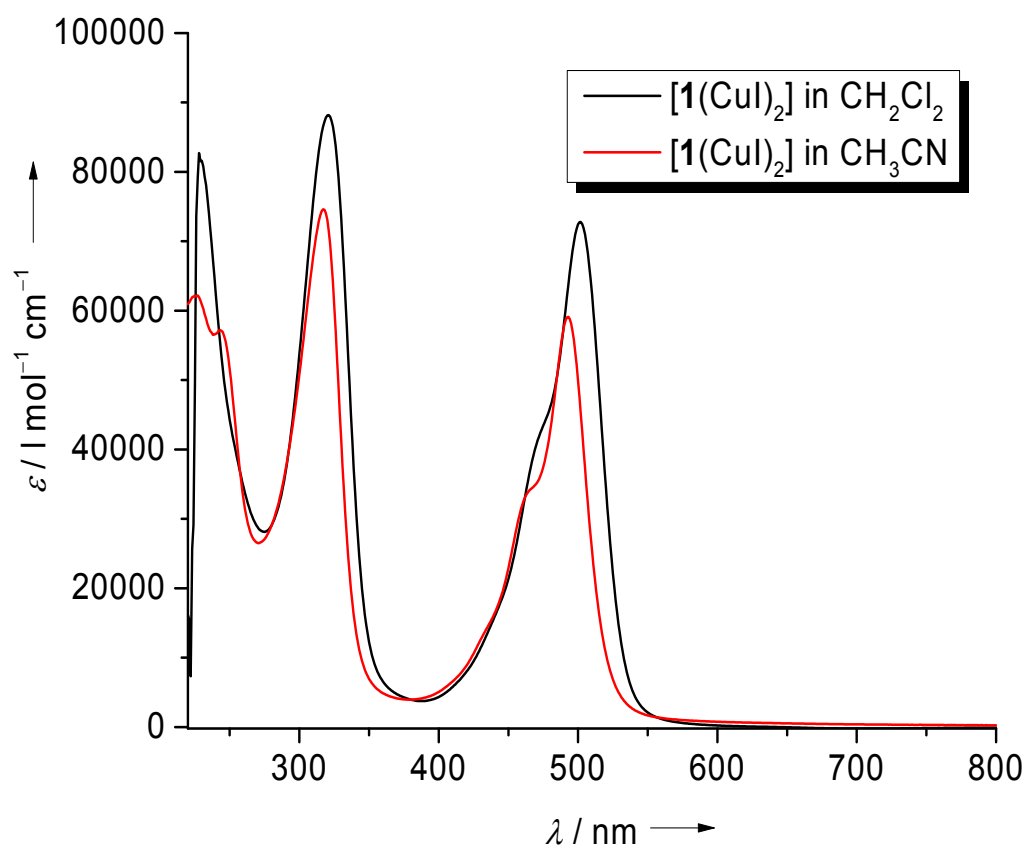



**Figure S6.** Absorption spectra for addition of a ZnCl<sub>2</sub> solution (1 μL = 0.2 eq.) to a 0.64 · 10<sup>-5</sup> mol/l solution (3 mL) of [1(ZnCl<sub>2</sub>)<sub>2</sub>] in CH<sub>2</sub>Cl<sub>2</sub>.

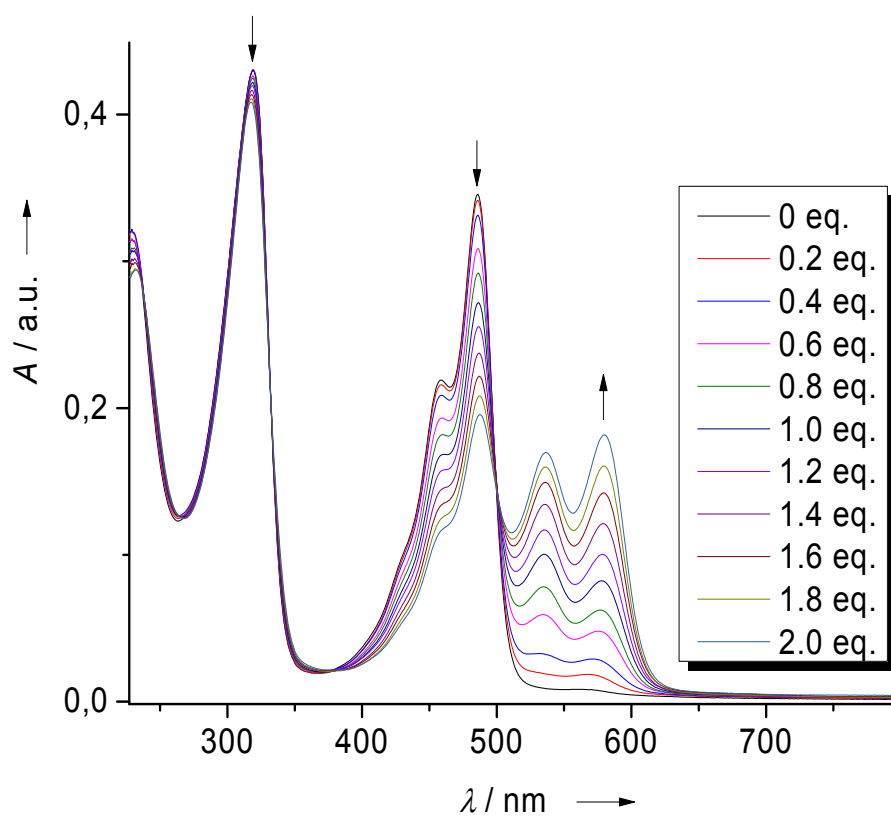

**Figure S7.** Diffuse reflectance spectrum of the solid coordination polymer ( $[\mathbf{1}(\text{ZnCl}_2)_3]_n$ ) precipitating in the course of reaction of  $[\mathbf{1}(\text{ZnCl}_2)_2]$  with an excess of  $\text{ZnCl}_2$ . The solid was embedded in a  $\text{BaSO}_4$  matrix. For comparison, the spectrum of  $\mathbf{1}$  in  $\text{CH}_3\text{CN}$  solution is shown underneath.

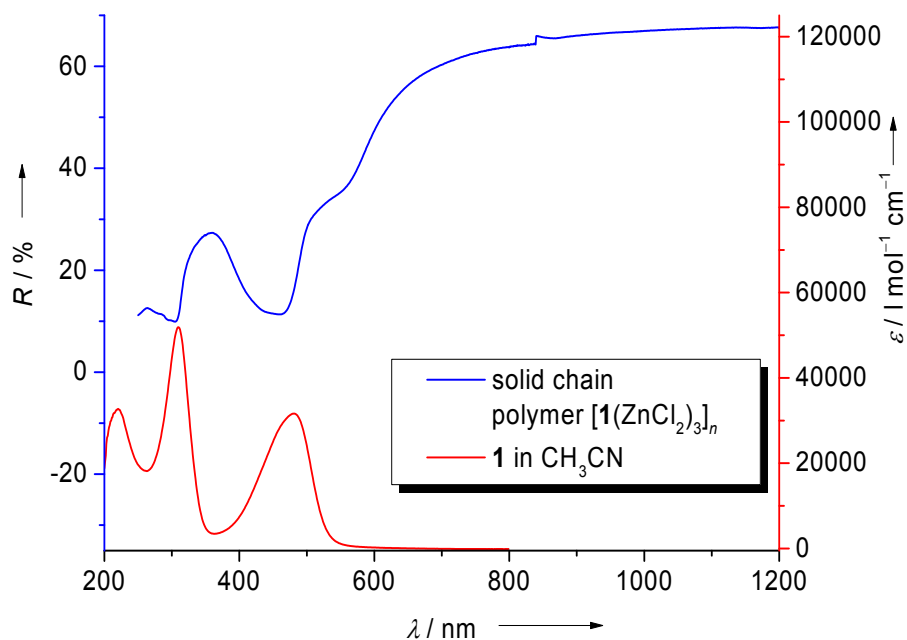

**Table S1.** Comparison between the experimentally determined and calculated bond distances (in Å) for the new compound **1**. See Figure 1 for the atom numbers. This calculations should test the quality of the calculations.

| bond distances [Å] | exp.     | Gaussian<br>B3LYP/6-311G** | Turbomole<br>BP/def2-SV(P) |
|--------------------|----------|----------------------------|----------------------------|
| N1-C1              | 1.395(4) | 1.397                      | 1.385                      |
| N1-C7              | 1.302(4) | 1.292                      | 1.303                      |
| N2-C7              | 1.390(4) | 1.392                      | 1.396                      |
| N3-C7              | 1.363(4) | 1.390                      | 1.403                      |
| N4-C2              | 1.403(4) | 1.393                      | 1.385                      |
| N4-C12             | 1.298(4) | 1.289                      | 1.303                      |
| N5-C12             | 1.382(4) | 1.390                      | 1.396                      |
| N6-C12             | 1.390(4) | 1.396                      | 1.403                      |
| N7-C4              | 1.346(4) | 1.342                      | 1.351                      |
| N7'-C5             | 1.354(4) | 1.341                      | 1.351                      |
| C1-C2              | 1.457(5) | 1.458                      | 1.471                      |
| C1-C6              | 1.382(4) | 1.378                      | 1.398                      |
| C2-C3              | 1.371(5) | 1.377                      | 1.398                      |
| C3-C4              | 1.426(4) | 1.420                      | 1.428                      |
| C4-C5              | 1.435(4) | 1.443                      | 1.459                      |
| C5-C6              | 1.417(4) | 1.421                      | 1.428                      |

**Table S2.** Contributions of the valence orbitals to the electronic transitions in **1**, [**1**(ZnCl<sub>2</sub>)<sub>2</sub>] and [(**1**)<sub>2</sub>(ZnCl<sub>2</sub>)<sub>5</sub>] as calculated with B3LYP/def2-SV(P).

|                                                                | wavenumber of transition (nm) | orbital number, occupied orbital | orbital number, acceptor orbital | contribution (%) |
|----------------------------------------------------------------|-------------------------------|----------------------------------|----------------------------------|------------------|
| <b>1</b>                                                       | 440.76                        | 235(HOMO)                        | 236(LUMO)                        | 94.0             |
| [ <b>1</b> (ZnCl <sub>2</sub> ) <sub>2</sub> ]                 | 461.57                        | 171(HOMO)                        | 172(LUMO)                        | 92.6             |
| [( <b>1</b> ) <sub>2</sub> (ZnCl <sub>2</sub> ) <sub>5</sub> ] | 503.02                        | 502                              | 504                              | 44.4             |
|                                                                |                               | 501                              | 503                              | 37.4             |
|                                                                |                               | 502 (HOMO)                       | 503 (LUMO)                       | 7.2              |
|                                                                |                               | 501                              | 504                              | 5.4              |
|                                                                | 500.78                        | 501                              | 503                              | 19.7             |
|                                                                |                               | 501                              | 504                              | 19.2             |
|                                                                |                               | 502                              | 504                              | 18.4             |
|                                                                |                               | 502                              | 503                              | 13.1             |
|                                                                |                               | 499                              | 504                              | 11.9             |
|                                                                |                               | 500                              | 503                              | 5.7              |
|                                                                |                               | 499                              | 503                              | 4.5              |
|                                                                | 496.16                        | 500                              | 503                              | 39.4             |
|                                                                |                               | 499                              | 504                              | 15.7             |
|                                                                |                               | 500                              | 504                              | 11.9             |
|                                                                |                               | 499                              | 503                              | 7.7              |
|                                                                |                               | 501                              | 504                              | 7.0              |
|                                                                |                               | 501                              | 503                              | 6.6              |
|                                                                |                               | 502                              | 504                              | 6.1              |

**Figure S8.** Visualization of the HOMO and LUMO of **1** and  $[1(\text{ZnCl}_2)_2]$  (B3LYP/def2-SV(P) calculations).

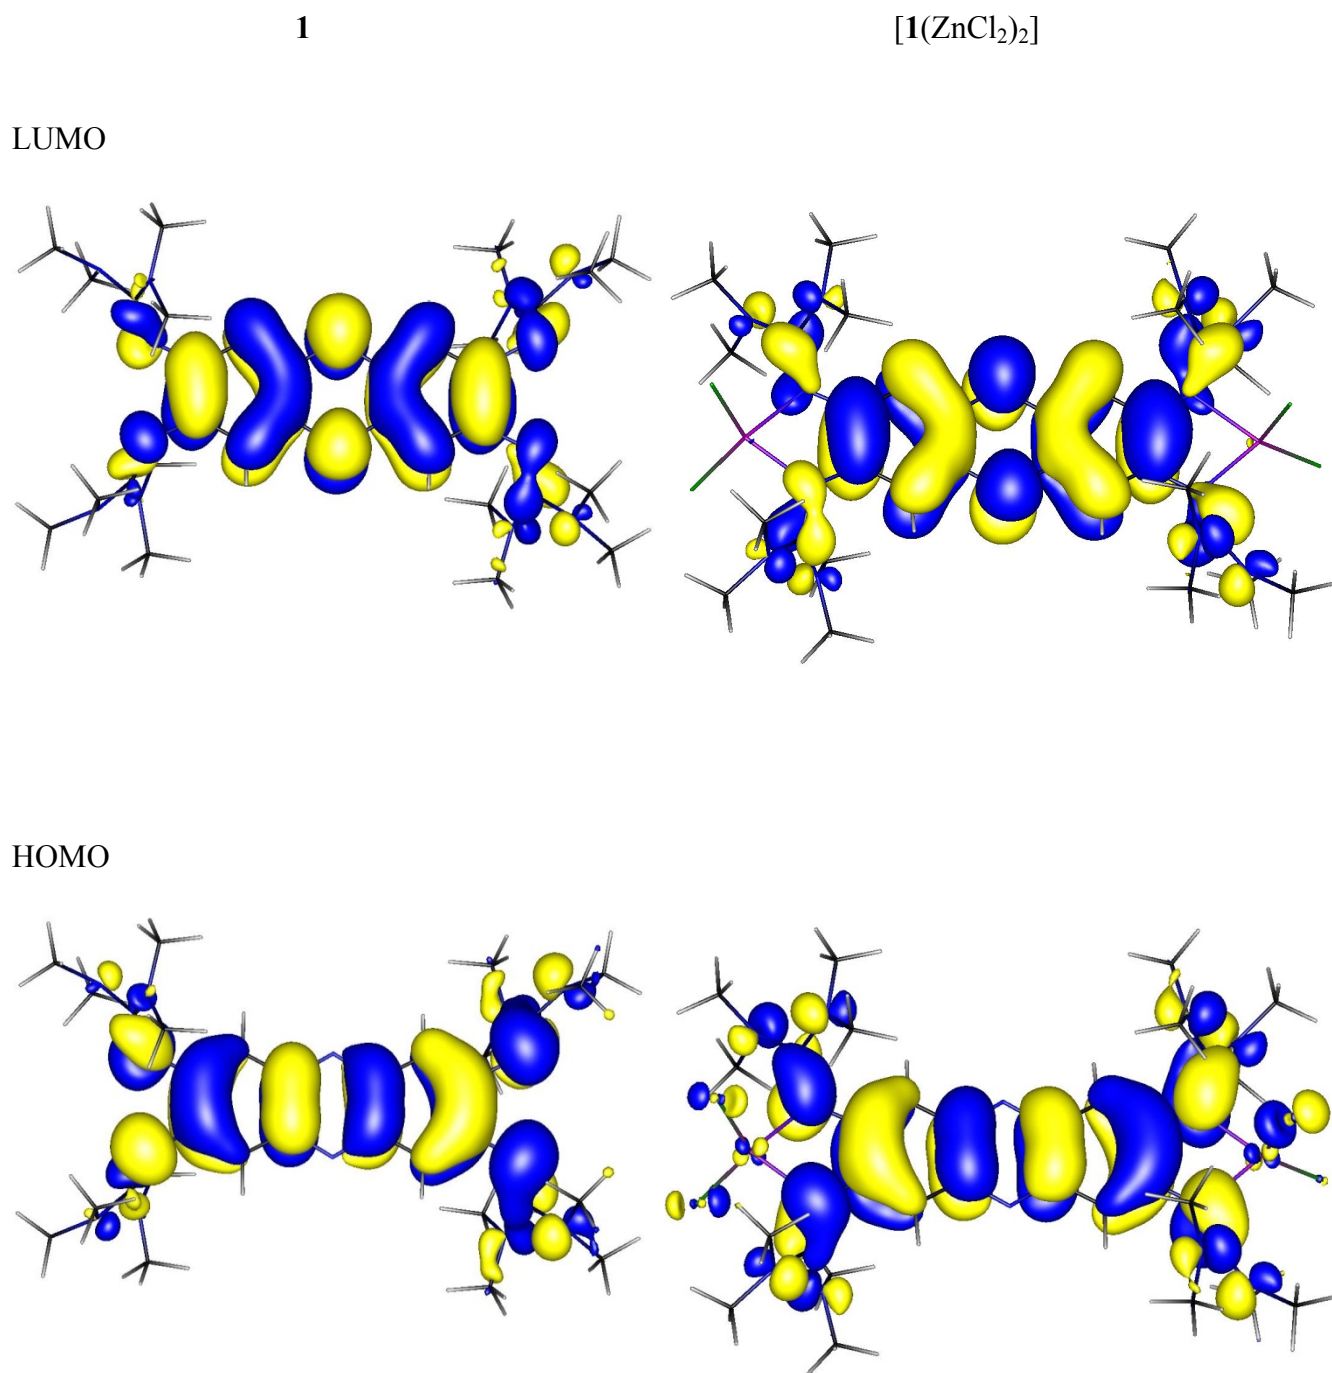

**Figure S9.** Visualization of the isodensity surfaces for the HOMO and LUMO of  $[(1)_2(ZnCl_2)_5]$  (B3LYP/def2-SV(P) calculations).

LUMO

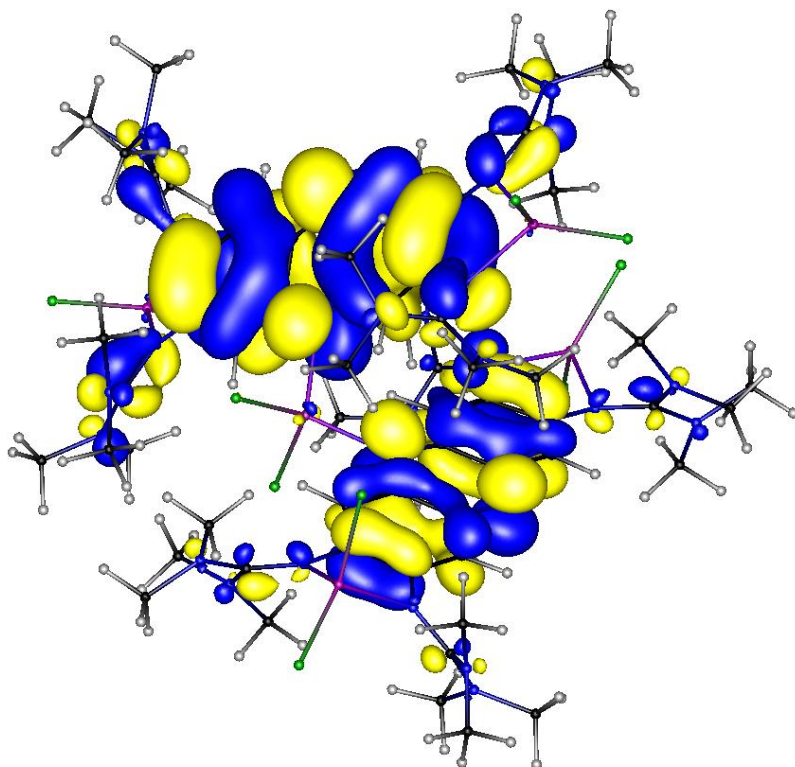

HOMO

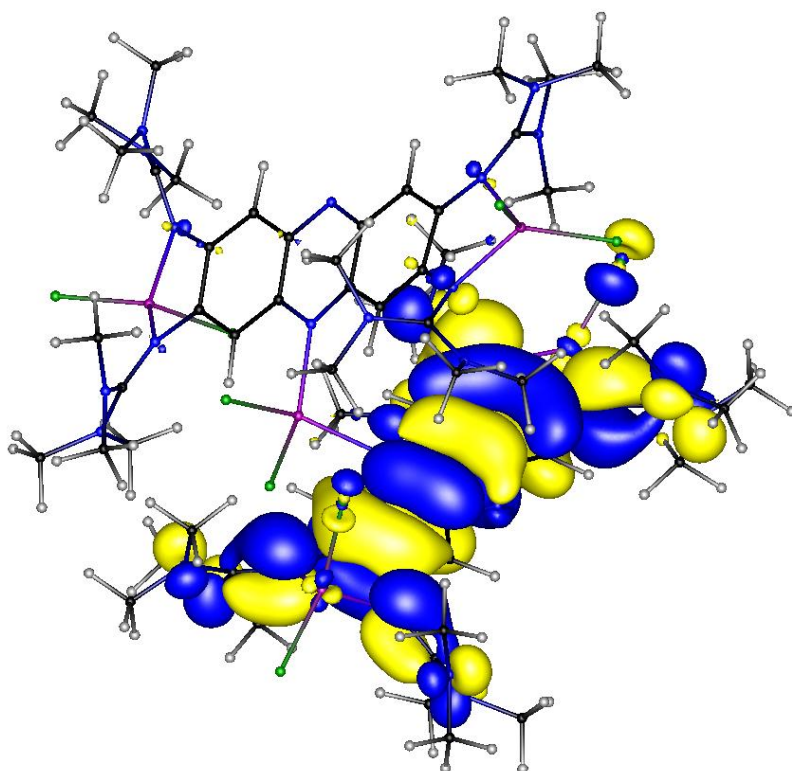

**Figure S10.** Visualization of the isodensity surfaces for the orbitals contributing to the electronic transitions (B3LYP/def2-SV(P), see also Table S1).

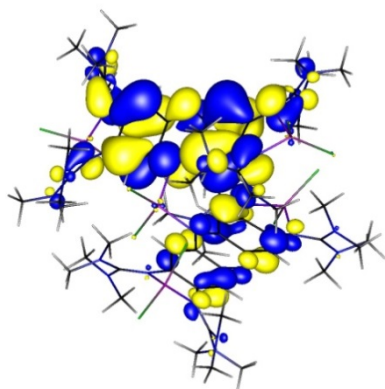

499

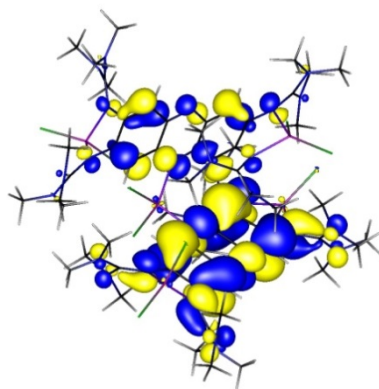

500

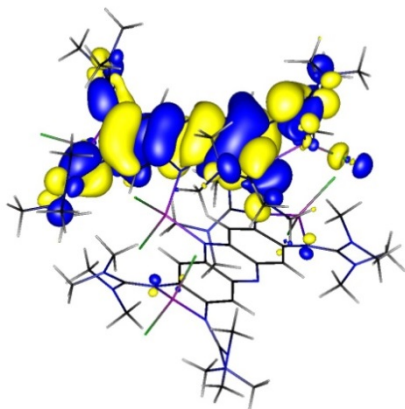

501

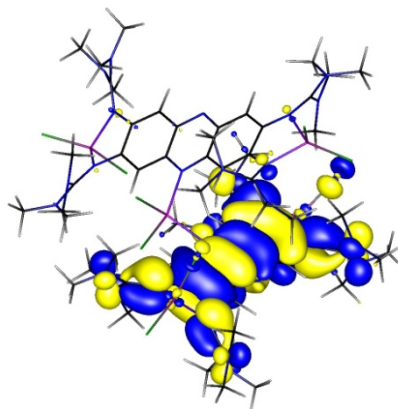

502 HOMO

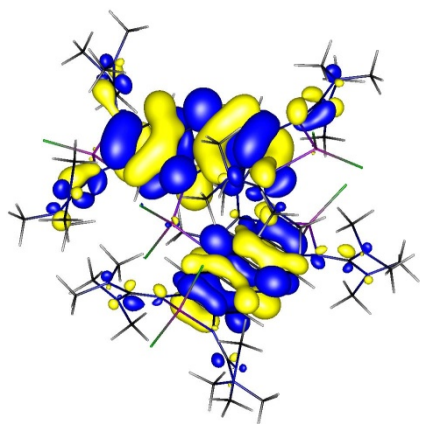

503 LUMO

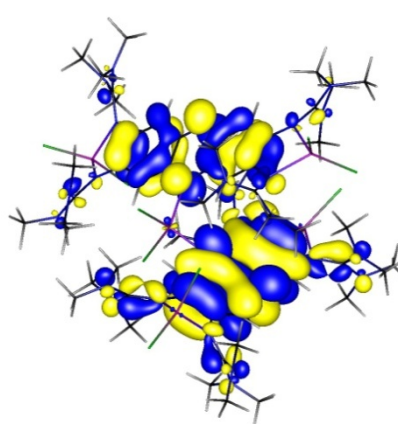

504

**Figure S11.** UV/Vis spectra recorded for experiments, in which the product from reaction between  $[\mathbf{1}(\text{ZnCl}_2)_2]$  and 0.5 eq. of  $\text{ZnCl}_2$  (the stoichiometry of  $[(\mathbf{1})_2(\text{ZnCl}_2)_5]$ ) was dissolved in several concentrations in different solvents.

Solvent:  $\text{CHCl}_3$

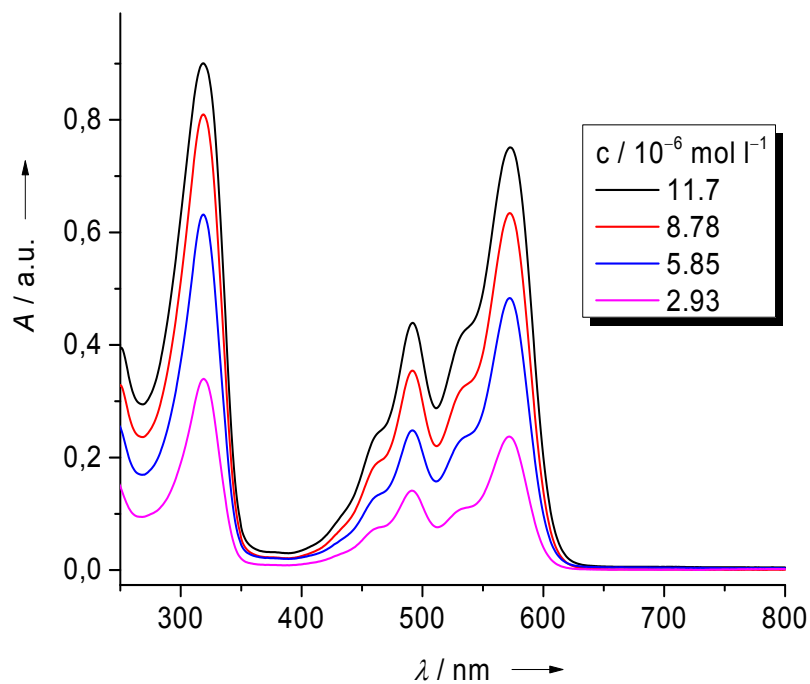

Solvent:  $\text{CH}_2\text{Cl}_2$

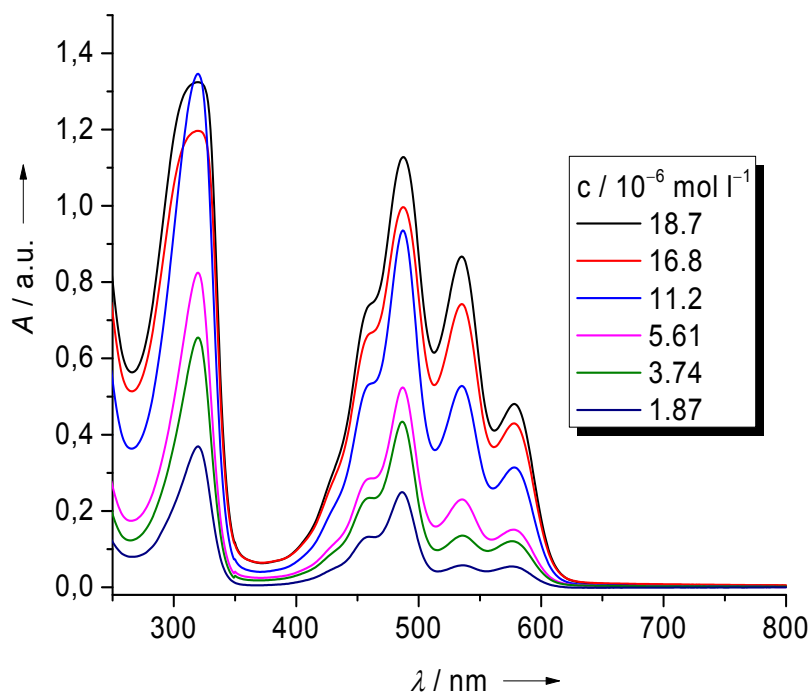



Solvent: THF

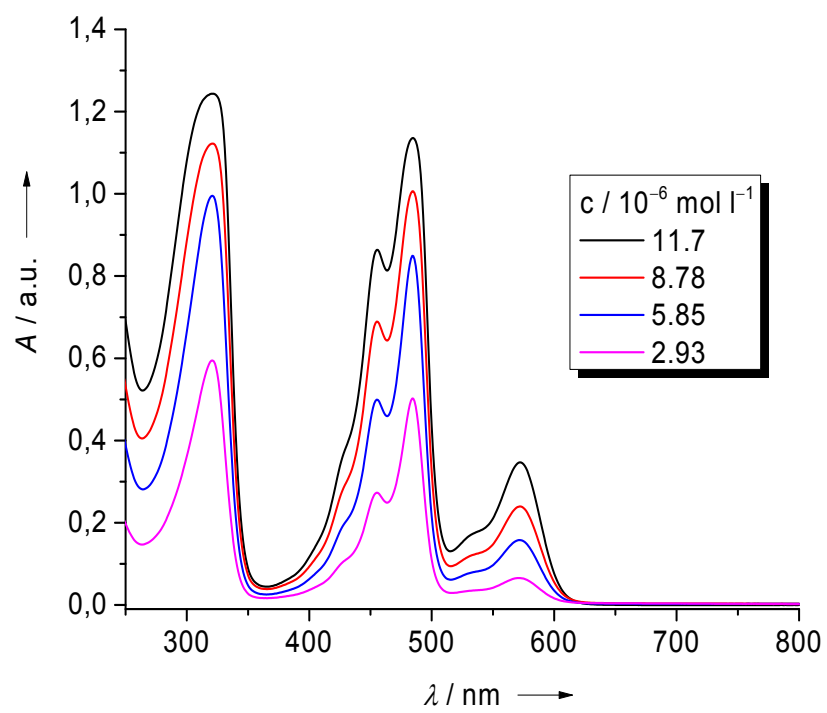

Supplement: c4dt03572k1.pdf [file c4dt03572k1.pdf]
